25 **ABSTRACT**

26 **Background:** Little is known regarding the long-term adverse effects of COVID-19 on female-  
27 specific cancers due to the restricted length of observational time, nor the shared genetic  
28 influences underlying these conditions.

29 **Methods:** Leveraging summary statistics from the hitherto largest genome-wide association  
30 studies conducted in each trait, we performed a comprehensive genome-wide cross-trait  
31 analysis to investigate the shared genetic architecture and the putative genetic associations  
32 between COVID-19 with three main female-specific cancers: breast cancer (BC), epithelial  
33 ovarian cancer (EOC), and endometrial cancer (EC). Three phenotypes were selected to  
34 represent COVID-19 susceptibility (SARS-CoV-2 infection) and severity (COVID-19  
35 hospitalization, COVID-19 critical illness).

36 **Results:** For COVID-19 susceptibility, we found no evidence of a genetic correlation with any  
37 of the female-specific cancers. For COVID-19 severity, we identified a significant genome-  
38 wide genetic correlation with EC for both hospitalization ( $r_g=0.19$ ,  $P=0.01$ ) and critical illness  
39 ( $r_g=0.29$ ,  $P=3.00\times 10^{-4}$ ). Mendelian randomization demonstrated no valid association of  
40 COVID-19 with any cancer of interest, except for suggestive associations of genetically  
41 predicted hospitalization ( $OR_{IVW}=1.09$ ,  $95\%CI=1.01-1.18$ ,  $P=0.04$ ) and critical illness  
42 ( $OR_{IVW}=1.06$ ,  $95\%CI=1.00-1.11$ ,  $P=0.04$ ) with EC risk, none withstanding multiple correction.  
43 No reverse association was found. Cross-trait meta-analysis identified multiple pleiotropic  
44 SNPs between COVID-19 and female-specific cancers, including 20 for BC, 15 for EOC, and  
45 5 for EC. Transcriptome-wide association studies revealed shared genes, mostly enriched in the  
46 hematologic, cardiovascular, and nervous systems.

47 **Conclusions:** Our genetic analysis highlights an intrinsic link underlying female-specific  
48 cancers and COVID-19 - while COVID-19 is not likely to elevate the immediate risk of the  
49 examined female-specific cancers, it appears to share mechanistic pathways with these  
50 conditions. These findings may provide implications for future therapeutic strategies and public

51 health actions.

52 **Keywords:** COVID-19, SRAS-CoV-2, female-specific cancer, pleiotropic loci, Mendelian

53 randomization, genetic correlation

## 54 **Introduction**

55 With more than half a billion registered infections and 6.4 million deaths globally, the  
56 coronavirus disease 2019 (COVID-19) continues to spread (WHO: <https://covid19.who.int/>).  
57 Despite lungs being the organ predominately affected, a multi-system involvement of COVID-  
58 19 is well-characterized, with extra-pneumatic manifestations documented in hematologic,  
59 cardiovascular, neurological tissues, and others, possibly caused by direct viral virulence or as  
60 a result of immunopathological reactions<sup>1,2</sup>. Moreover, while most COVID-19 patients recover  
61 within a couple of weeks after infection, a non-negligible proportion of individuals experience  
62 chronic symptoms lasting for months, especially in women<sup>3,4</sup>. Given the extensive and likely  
63 prolonged impairment of COVID-19 on multiple bodily systems, its long-term sequelae have  
64 become increasingly recognized and concerning<sup>3,5</sup>.

65 Strong evidence has been raised reflecting the disparities in COVID-19 pandemic, potentially  
66 mediated through unique social determinants of health<sup>6,7</sup>. Women, especially those with high  
67 health burdens are affected disproportionately by COVID-19<sup>6,8</sup>. For example, individuals with  
68 breast cancer (BC) were nearly 3-times more likely to die from COVID-19 than their non-  
69 cancer referents (odds ratio, OR = 3.30; 95% confidence interval, 95%CI = 1.96-5.57)<sup>9</sup>. Among  
70 women with gynecological cancers, mainly epithelial ovarian cancer (EOC) and endometrial  
71 cancer (EC), a significantly increased mortality due to COVID-19 (14.0%)<sup>10</sup> was found  
72 compared to general population (5.6%)<sup>11</sup>. Indeed, several shared signaling pathways, including  
73 cytokine, immunosuppression, coagulation disorders, inflammatory reactions, and hormone  
74 secretion<sup>12-15</sup>, have been reported. Nevertheless, whether COVID-19 increases the susceptibility  
75 to cancer in those without prior malignancies remains unclear due to the hitherto restricted  
76 length of observational time. It is concerned that COVID-19 may predispose recovered patients  
77 to cancer development based on the growing evidence of SARS-CoV-2 in modulating  
78 oncogenic pathways, promoting chronic low-grade inflammation, and causing tissue  
79 damage<sup>12,16</sup>.

80 One way of evaluating the putative causal association underlying two phenotypes is to apply

81 Mendelian randomization (MR)<sup>17</sup>, a framework leveraging genetic variants as instruments to  
82 overcome the limitation of conventional epidemiological designs, such as restricted  
83 observational duration, environmental confounder, and reverse association<sup>18</sup>. Using other  
84 genetic methods including genetic correlation analysis<sup>19</sup>, cross-trait meta-analysis<sup>20</sup>, and  
85 transcriptome-wide association study (TWAS)<sup>21</sup>, shared genetic influences across traits can also  
86 be quantified, driving forward epidemiologic associations with novel insights into the  
87 underlying biological mechanisms. Here, we apply these methods to perform a comprehensive  
88 genome-wide cross-trait analysis<sup>18</sup>, with an overarching goal of characterizing the shared  
89 genetic architecture and the putative associations underpinning COVID-19 and female-specific  
90 cancers (BC, EOC, and EC). Three COVID-19 phenotypes were included, namely SARS-CoV-  
91 2 infection, COVID-19 hospitalization, and COVID-19 critical illness. The overview of study  
92 design is shown in **Fig 1**.

93

## 94 **Materials and methods**

### 95 **GWAS data sets**

96 **Cancer** Three common female malignant tumors, the breast cancer (BC), the epithelial ovarian  
97 cancer (EOC), and the endometrial cancer (EC)<sup>22</sup>, were included in our study. GWAS summary  
98 data of BC was obtained from a meta-analysis of the Breast Cancer Association Consortium  
99 (BCAC) and 11 other BC genetic studies<sup>23</sup>, involving 133,384 cases and 113,789 controls.  
100 GWAS summary data of overall invasive EOC was obtained from the Ovarian Cancer  
101 Association Consortium (OCAC) meta-analysis<sup>24</sup>, involving 22,406 cases and 40,941 controls.  
102 GWAS summary data of EC was obtained from a meta-analysis of the Endometrial Cancer  
103 Association Consortium (ECAC), the Epidemiology of Endometrial Cancer Consortium  
104 (E2C2), and the UK Biobank<sup>25</sup>, involving 12,906 cases and 108,979 controls. All individuals  
105 were of European ancestry.

106 **COVID-19** For COVID-19 phenotypes, we used the hitherto largest GWAS summary data of

107 European ancestry conducted by the COVID-19 Host Genetics Initiative, release 7  
108 (<https://www.covid19hg.org/>), from which subjects of 23andMe were excluded due to data  
109 restrictions<sup>26</sup>. Three phenotypes were selected and further divided into two categories,  
110 representing COVID-19 susceptibility and severity. **SARS-CoV-2 infection**, defined as “cases  
111 with reported SARS-CoV-2 infection regardless of symptoms (N = 122,616) vs. population (N  
112 = 2,475,240)”, was used to index COVID-19 susceptibility. **COVID-19 hospitalization**,  
113 defined as “moderate or severe COVID-19 patients who were hospitalized due to COVID-19  
114 symptoms (N = 32,519) vs. population (N = 2,062,805)”, and **COVID-19 critical illness**,  
115 defined as “severe COVID-19 patients who needed respiratory support or who died due to the  
116 disease (N = 13,769) vs. population (N = 1,072,442)” were used to index COVID-19 severity.  
117 Considering a potential sample overlap between GWAS of EC and GWAS of COVID-19  
118 phenotypes (both involving UK Biobank subjects), we further performed a sensitivity analysis  
119 using trans-ancestry COVID-19 GWAS excluding individuals of UKB. Details on the  
120 characteristics of each included dataset are presented in **Supplementary Table 1**.

## 121 **Statistical analysis**

122 **Genome-wide genetic correlation analysis** To describe the average shared genetic effect  
123 between female-specific cancers and COVID-19 phenotypes, we quantified their genome-wide  
124 genetic correlation using pairwise linkage-disequilibrium score regression (LDSC)<sup>19</sup>. The  
125 genetic correlation estimates  $r_g$  range from  $-1$  to  $+1$ , with  $+1$  indicating a complete positive  
126 correlation and  $-1$  indicating a complete negative correlation. We used pre-computed LD-  
127 scores obtained from  $\sim 1.2$  million common SNPs of European ancestry represented in the  
128 Hapmap3 reference panel. Bonferroni correction was applied to account for multiple testing.  
129 We defined a significant  $r_g$  as  $P < 5.56 \times 10^{-3}$  ( $\alpha = 0.05/9$ , number of phenotype pairs)<sup>27</sup>, and  
130 suggestive  $r_g$  as  $5.56 \times 10^{-3} \leq P < 0.05$ .

131 **Bidirectional Mendelian randomization analysis** The average shared genetic effects can be  
132 decomposed into vertical pleiotropy and/or horizontal pleiotropy, where vertical pleiotropy (or  
133 a putative causal association) refers to genetic variants affecting one trait (outcome) via its

134 effect on an intermediate trait (exposure), and horizontal pleiotropy, often simplified as  
135 pleiotropy, refers to genetic variants affecting both traits independently<sup>18</sup>. To further explore  
136 these alternatives, we first conducted a bidirectional two-sample MR between COVID-19  
137 phenotypes and female-specific cancers. As no significant SNP was reported in the original  
138 COVID-19 GWAS, we selected independent instrumental variables (IVs) by clumping all  
139 variants that reached genome-wide significance ( $P < 5 \times 10^{-8}$ ) according to a strict criterion ( $r^2 \leq$   
140 0.001 within a 1.0Mb window). For cancers, we collected all previously reported independent  
141 index SNPs reaching genome-wide significance ( $P < 5 \times 10^{-8}$ ) from corresponding GWAS. We  
142 calculated the  $F$ -statistic to evaluate instrument strength, with an  $F$ -statistic  $< 10$  indicating a  
143 weak instrument<sup>28</sup>.

144 We applied inverse-variance weighted (IVW) method as our primary approach<sup>17</sup>,  
145 complemented with MR-Egger<sup>29</sup> and weighted median<sup>30</sup> to evaluate its robustness. A  
146 Bonferroni-corrected significance threshold of  $P < 5.56 \times 10^{-3}$  ( $\alpha = 0.05/9$ , number of phenotype  
147 pairs) was applied<sup>27</sup>, while  $5.56 \times 10^{-3} \leq P < 0.05$  was defined as suggestive significance. An MR  
148 effect estimate was considered robust if it was statistically significant in IVW and remained  
149 directionally consistent across both the MR-Egger and the weighted median approaches.

150 To validate MR model assumptions, we conducted several important sensitivity analyses. First,  
151 we excluded palindromic IVs that have the same alleles on forward and reverse strands, and  
152 pleiotropic IVs that are associated with potential confounders according to GWAS catalog  
153 (<https://www.ebi.ac.uk/gwas/>, accessed on 05/08/2021). Next, we performed a leave-one-out  
154 analysis in which we excluded one IV at a time and conducted IVW using the remaining SNPs  
155 to identify outlying instruments. Finally, we used MR-Pleiotropy Residual Sum and Outlier  
156 (MR-PRESSO) approach to detect and correct for horizontal pleiotropy<sup>31</sup>.

157 **Cross-trait meta-analysis** To identify pleiotropic loci affecting both traits, we further  
158 performed a cross-trait meta-analysis using Cross Phenotype Association (CPASSOC)<sup>20</sup>. We  
159 chose  $S_{\text{Het}}$ , a statistic that is more powerful for heterogenous effects (common when meta-  
160 analysing different traits), to combine summary statistics across traits. We used PLINK 1.9

161 “clumping” function to obtain independent loci with parameters: --clump-p1 5e-8 --clump-p2  
162 1e-5 --clump-r2 0.2 --clump-kb 500<sup>32</sup>. Index SNPs, satisfying  $P_{CAPSSOC} < 5 \times 10^{-8}$  and  $P_{\text{single-trait}} <$   
163  $1 \times 10^{-3}$  (both traits), were considered as significant pleiotropic SNPs. An index SNP satisfying  
164 the following conditions was considered as a novel shared SNP: (1) did not reach genome-wide  
165 significance ( $5 \times 10^{-8} < P_{\text{single-trait}} < 1 \times 10^{-3}$ ) in single-trait GWAS; and (2) was not in LD ( $r^2 < 0.05$ )  
166 with any of the previously reported genome-wide significant SNPs in single-trait GWAS. To  
167 further investigate biological insights for the shared variants, we use Ensemble Variant Effect  
168 Predictor (VEP) to annotate the linear closest genes of the identified pleiotropic SNPs<sup>33</sup>.

169 **Fine-mapping credible set and colocalization analysis** Due to the complex LD patterns  
170 among SNPs, index SNPs are not necessarily causal variations<sup>34</sup>. We conducted a fine-mapping  
171 analysis using FM-summary to identify a credible set of variants that were 99% likely to contain  
172 causal variants at each of the shared loci. FM-summary is a fine-mapping algorithm in Bayesian  
173 framework which maps the primary signal and uses a flat prior with steepest descent  
174 approximation<sup>35</sup>.

175 To assess whether the same variants are responsible for two GWAS signals or are distinct  
176 variants close to each other, we conducted a colocalization analysis using Coloc<sup>36</sup>. Coloc is a  
177 tool in Bayesian framework that provides intuitive posterior probabilities of 5 hypotheses (H0-  
178 H4). We extracted summary statistics for variants within 500 kb of each shared index SNP and  
179 calculated the posterior probability for H4 (PPH4, the probability that both traits are associated  
180 through sharing a single causal variant). A locus was considered colocalized if PPH4 was  
181 greater than 0.5.

182 **Transcriptome-wide association studies** Many genetic variants implement their function by  
183 modulating gene expression in different tissues, thus, considering gene expression and tissue  
184 specificity help clarify common biological mechanisms. We performed TWAS to identify genes  
185 whose expression is significantly associated with traits using FUSION<sup>21</sup>. We integrated GWAS  
186 summary data with expression weights across 48 tissues from GTEx (Genotype-Tissue  
187 Expression, version 7), with one tissue-trait pair at a time. Bonferroni-correction was applied



188 for all gene-tissue pairs tested (~230,000 in total) within each trait, and  $P_{\text{Bonferroni}} < 0.05$  was  
189 defined as significance<sup>27</sup>. To identify an independent set of gene-tissue pairs, we conducted  
190 joint/conditional tests (an extension of TWAS) among regions with multiple identified signals<sup>37</sup>.  
191 Shared gene-tissue pairs were determined through intersection across traits.

192

## 193 **Results**

194 **Genome-wide genetic correlation** For COVID-19 susceptibility, we found no evidence on a  
195 shared genetic basis with any of the female-specific cancers (BC:  $r_g = -0.01$ ,  $P = 0.90$ ; EOC:  
196  $r_g = 0.01$ ,  $P = 0.91$ ; EC:  $r_g = 0.09$ ,  $P = 0.23$ ; **Table 1**). For COVID-19 severity, we identified a  
197 suggestive genetic correlation for hospitalization with EC ( $r_g = 0.19$ ,  $P = 0.01$ ), as well as a  
198 significant genetic correlation for critical illness with EC ( $r_g = 0.29$ ,  $P = 3.00 \times 10^{-4}$ ). No  
199 significant result was found for COVID-19 severity with either BC (hospitalization:  $r_g = 0.06$ ,  
200  $P = 0.16$ ; critical illness:  $r_g = 0.05$ ,  $P = 0.28$ ) or EOC (hospitalization:  $r_g = -0.04$ ,  $P = 0.55$ ;  
201 critical illness:  $r_g = -0.02$ ,  $P = 0.77$ ). Interestingly, for EC and COVID-19, both the magnitude  
202 and the significance of  $r_g$  increased as the disease developed, from infection (0.09) to  
203 hospitalization (0.19) to critical illness (0.29).

204 **Bidirectional Mendelian randomization** We continued to conduct a MR to evaluate potential  
205 associations of genetically predicted COVID-19 phenotypes on female-specific cancers risk,  
206 motivated by the significant shared genetic basis. We identified and selected 16, 38, and 37  
207 SNPs as IVs for infection, hospitalization, and critical illness of COVID-19.  $F$ -statistics  
208 suggested minimal weak instrument bias (**Supplementary Table 2**). **For COVID-19**  
209 **susceptibility**, we did not find any association with female-specific cancer (BC:  $\text{OR}_{\text{IVW}} = 0.99$ ,  
210  $95\% \text{CI} = 0.86\text{-}1.14$ ,  $P = 0.92$ ; EOC:  $\text{OR}_{\text{IVW}} = 1.19$ ,  $95\% \text{CI} = 0.95\text{-}1.48$ ,  $P = 0.12$ ; EC:  $\text{OR}_{\text{IVW}} =$   
211  $1.26$ ,  $95\% \text{CI} = 0.97\text{-}1.64$ ,  $P = 0.09$ ; **Fig 2** and **Supplementary Table 3-4**). **For COVID-19**  
212 **severity**, genetically predicted hospitalization ( $\text{OR}_{\text{IVW}} = 1.09$ ,  $95\% \text{CI} = 1.01\text{-}1.18$ ,  $P = 0.04$ ) and  
213 critical illness ( $\text{OR}_{\text{IVW}} = 1.06$ ,  $95\% \text{CI} = 1.00\text{-}1.11$ ,  $P = 0.04$ ) were associated with the risk of

214 EC under suggestive significance, none of which withstood multiple correction. The estimates  
215 remained directionally consistent using the MR-Egger regression (hospitalization: OR = 1.06,  
216 95%CI = 0.91-1.24; critical illness: OR = 1.03, 95%CI = 0.93-1.13) or the weighted median  
217 approach (hospitalization: OR = 1.05, 95%CI = 0.95-1.16; critical illness: OR = 1.03, 95%CI =  
218 0.97-1.10). No substantial alteration was found after excluding palindromic SNPs or pleiotropic  
219 SNPs, and the leave-one-out analysis demonstrated that the pooled estimate was not driven by  
220 any outlying variant. MR-PRESSO yielded to similar findings. No association of genetically  
221 predicted COVID-19 severity was found for BC (hospitalization:  $OR_{IVW} = 1.00$ , 95%CI = 0.96-  
222 1.05; critical illness:  $OR_{IVW} = 1.01$ , 95%CI = 0.98-1.04) or EOC (hospitalization:  $OR_{IVW} = 1.01$ ,  
223 95%CI = 0.92-1.10; critical illness:  $OR_{IVW} = 0.99$ , 95%CI = 0.92-1.06).

224 In the reverse-direction MR where female-specific cancers were considered as exposures, we  
225 selected 168, 13, and 16 SNPs as IVs to proxy BC, EOC, and EC. *F*-statistics for these IVs  
226 suggested strong instruments (**Supplementary Table 5**). None of the three genetically  
227 predicted female-specific cancers appeared to affect COVID-19 susceptibility or severity (**Fig**  
228 **2 and Supplementary Table 6**).

229 **Cross-trait meta-analysis and pleiotropic loci** With little sign of vertical pleiotropy, we  
230 continued to perform cross-trait meta-analysis to reveal horizontal pleiotropic effect of  
231 individual variant. A total of 20 independent pleiotropic SNPs were identified as shared by BC  
232 with at least one COVID-19 phenotype, including 7 for infection, 7 for hospitalization, and 6  
233 for critical illness (**Fig 3 and Supplementary Table 7-10**). These 20 SNPs were mainly located  
234 at genomic regions 17q21.31 (harboring *WNT3*, *MAPT*, *CRHR1*, and *PLEKHM1*), 9q34.2  
235 (harboring *ABO*, *LCNIP2*, and *REXO4*), and 1q22 (harboring *THBS3*, *GON4L*, and *PMF1*).  
236 Notably, SNP rs910416 located at 6q25.1 showed the most significance ( $P_{CPASSOC} = 1.90 \times 10^{-29}$ ),  
237 followed by SNP rs17474001 at 9q34.2 ( $P_{CPASSOC} = 2.48 \times 10^{-26}$ ), and SNP rs9411395 at 9q34.2  
238 ( $P_{CPASSOC} = 4.71 \times 10^{-26}$ ). We also identified a novel shared locus (index SNP rs1052067,  
239  $P_{CPASSOC} = 2.76 \times 10^{-08}$ ) located at 1q22.

240 A total of 15 independent pleiotropic SNPs were identified as shared by EOC with at least one  
241 COVID-19 phenotype, including 5 for infection, 6 for hospitalization, and 4 for critical illness.  
242 These 15 SNPs were mainly distributed at 2 loci, 9q34.2 (harboring *ABO*, *SURF4*, and *LCNIP2*)  
243 and 17q21.31 (harboring *WNT3*, *MAPT*, *CRHRI*, and *PLEKHMI*). All top-three most  
244 significant SNPs were located at 9q34.2, including SNP rs554833 ( $P_{\text{CPASSOC}} = 1.28 \times 10^{-88}$ ), SNP  
245 rs657152 ( $P_{\text{CPASSOC}} = 6.25 \times 10^{-25}$ ), and SNP rs56343119 ( $P_{\text{CPASSOC}} = 1.28 \times 10^{-22}$ ).

246 A total of 5 independent pleiotropic SNPs were identified as shared by EC with at least one  
247 COVID-19 phenotype, including 2 for infection, 3 for hospitalization, and 2 for critical illness.  
248 Three out of the 5 shared SNPs were located at 9q34.2 (harboring *ABO*). Among the rest, SNP  
249 rs1123573 was located at 2p16.1 (harboring *BCL11A*), and SNP rs17601876 was located at  
250 15q21.2 (harboring *CYP19A1*, *RP11-108K3.1*). Index SNP rs554833 at 9q34.2 showed the most  
251 significance ( $P_{\text{CPASSOC}} = 3.29 \times 10^{-85}$ ), followed by SNP rs657152 at 9q34.2 ( $P_{\text{CPASSOC}} =$   
252  $3.77 \times 10^{-26}$ ), and SNP rs17601876 at 15q21.2 ( $P_{\text{CPASSOC}} = 3.07 \times 10^{-14}$ ).

253 **Identification of causal variants and colocalization** For all identified pleiotropic SNPs, we  
254 determined a 99% credible set of causal SNPs using FM-summary. A total of 4568 candidate  
255 SNPs were identified as the credible set of shared causal SNPs for BC and COVID-19  
256 phenotypes. Corresponding figures in EOC and EC were 4893 and 106. Particularly, we  
257 identified only one candidate causal SNP in the 99% credible set for BC/infection (rs12216896),  
258 BC/hospitalization (rs2887022), and EC/hospitalization (rs1123573). Lists of candidate causal  
259 SNPs at each pleiotropic locus were shown in **Supplementary Table 11-13**.

260 We next performed colocalization analysis to determine whether genetic variants driving the  
261 association between different traits are the same. We identified several loci to colocalize at the  
262 same candidate SNPs ( $\text{PPH4} > 0.5$ ), including 4 shared loci for BC and COVID-19 phenotypes,  
263 8 shared loci for EOC and COVID-19 phenotypes, and 3 shared loci for EC and COVID-19  
264 phenotypes (**Supplementary Table 14**).

265 **Transcriptome-wide association studies and shared genes** We identified multiple  
266 independent gene-tissue pairs shared between female-specific cancers and COVID-19

267 phenotypes (**Table 2**).

268 A total of 11 genes were TWAS-significant for BC with at least one COVID-19 phenotype,  
269 including 2 with infection, 7 with hospitalization, and 7 with critical illness, enriched in tissues  
270 of adrenal gland, artery, brain, heart, pancreas, skin, stomach and whole blood. Two genes were  
271 located at pleiotropic loci identified in cross-trait meta-analysis, including *ABO* (enriched in  
272 whole blood and shared by BC with all three COVID-19 phenotypes) and *MSTO2P* (enriched  
273 in muscle skeletal and pancreas).

274 A total of 8 genes were TWAS-significant for EOC with at least one COVID-19 phenotype,  
275 including one with infection, 7 with hospitalization, and 6 with critical illness, enriched in  
276 tissues of artery, adrenal gland, brain, breast mammary, pancreas, and vagina. Among these  
277 TWAS significant genes, *ABO* (enriched in artery aorta and shared by EOC with all three  
278 COVID-19 phenotypes), *CRHRI-ITI* (enriched in artery aorta and prostate), and *PLEKHMI*  
279 (enriched in brain cortex) were located at pleiotropic loci identified in cross-trait meta-analysis.

280 **Sensitivity analysis for sample overlap** A significant genetic correlation between COVID-19  
281 severity and EC as well as a suggestive effect of genetically predicted COVID-19 severity on  
282 EC risk were identified in the main analysis. Given the sample overlap (both GWASs contained  
283 UKB individuals), we additionally conducted a sensitivity analysis applying COVID-19 GWAS  
284 excluding UKB subjects. Results of the sensitivity analysis remained consistent with the main  
285 analysis, including directionally consistent genome-wide genetic correlation (infection:  $r_g =$   
286  $0.04$ ,  $P = 0.59$ ; hospitalization:  $r_g = 0.14$ ,  $P = 0.03$ ; critical illness:  $r_g = 0.22$ ,  $P = 1.70 \times 10^{-3}$ ),  
287 marginal associations between genetically predicted COVID-19 phenotypes with EC risk  
288 (infection:  $OR_{IVW} = 1.33$ ,  $95\%CI = 1.06-1.66$ ; hospitalization:  $OR_{IVW} = 1.11$ ,  $95\%CI = 1.03-1.1$ ;  
289 critical illness:  $OR_{IVW} = 1.06$ ,  $95\%CI = 1.00-1.12$ ), as well as 2 replicated pleiotropic SNPs  
290 (SNP rs1123573 and SNP rs550057, **Supplementary Tables 15-18**).

291

292 **Discussion**

293 Leveraging the hitherto largest genetic data and novel statistical approaches, the current study  
294 performed a comprehensive genome-wide cross-trait analysis to systematically investigate the  
295 shared genetic influences underpinning COVID-19 and female-specific malignancies. Our  
296 study covered both the susceptibility and severity of COVID-19, as well as the three most  
297 common female cancers, BC, EOC, and EC. From a genetic perspective, our work  
298 demonstrated biological links underlying these complex traits, highlighting shared mechanisms  
299 rather than potential causal associations.

300 COVID-19 presents a broad spectrum of clinical manifestations ranging from asymptomatic  
301 infection to death, with the host genetic determinants one of the main influential factors<sup>2,38</sup>. **For**  
302 **COVID-19 susceptibility**, our study suggested no apparent genetic association with any of the  
303 examined female-specific cancers. **While for COVID-19 severity**, we found a significant  
304 genome-wide genetic correlation for EC with both COVID-19 hospitalization and critical  
305 illness, highlighting a non-trivial genetic component that is shared by cancer and a worse  
306 symptom of COVID-19. Notably, as the severity of infection develops, the overall COVID-19-  
307 EC genetic correlation increases, even with a decreasing sample size of corresponding COVID-  
308 19 GWAS. This may be explained by a higher level of plasma cytokines and immune responses  
309 in severe COVID-19 patients, both of which are well-established hallmarks for cancer  
310 initiation<sup>39,40</sup>.

311 A shared genetic basis can be the result of vertical pleiotropy and/or horizontal pleiotropy. In  
312 our downstream analysis performed to explore these alternatives, we identified no association  
313 of genetically predicted **COVID-19 susceptibility** with any cancer of interest, largely in line  
314 with the overall null genetic correlation. Two previous studies reported suggestive associations  
315 between genetically predicted SARS-CoV-2 infection with EC risk (OR = 1.37, 95%CI = 1.11-  
316 1.69; OR = 1.17, 95%CI = 1.01-1.34)<sup>41,42</sup>. However, these studies applied a limited number of  
317 IVs generated from an older version of COVID-19 GWAS (Release 4), which might reduce the  
318 precision of MR estimates due to insufficient power. With an eight-times augmented sample  
319 size of COVID-19 cases (122,616 vs. 14,134) and a larger number of IVs (16 vs. 3 or 13), our

320 MR did not support for such potential associations. For **COVID-19 severity**, despite suggestive  
321 associations identified for genetically predicted hospitalization or critical illness on EC risk,  
322 none withstood multiple testing. While these findings were consistent with a previous MR  
323 reporting marginal associations (hospitalization: OR = 1.15, 95%CI = 1.00-1.31; critical illness:  
324 OR = 1.08, 95%CI = 1.01-1.15)<sup>42</sup>, both the significance and the magnitude of estimates in our  
325 study attenuated with a nearly four-times augmented sample size of severe cases  
326 (hospitalization: 32,519 vs. 6,404; critical illness: 13,769 vs. 4,336) and a five-times enlarged  
327 number of IVs (hospitalization: 38 vs. 7; critical illness: 37 vs. 7). Based on our current findings,  
328 a worse symptom of COVID-19 does not seem to represent a risk factor for EC development,  
329 while future investigations are warranted to further establish or rule out our findings. By  
330 applying a reverse directional MR design, we further confirmed that genetically predicted  
331 female-specific cancers appear not to affect either the susceptibility or the severity of COVID-  
332 19, concordant with a previous MR study<sup>43</sup>.

333 Taken together, our MR analysis delivers timely messages that may have important clinical and  
334 public health implications. We provide evidence suggesting that COVID-19 is not likely to pose  
335 a direct effect on the immediate risk of the examined female-specific cancers, suggesting that  
336 extra cancer screening in those recovered from COVID-19 may not confer a substantial public  
337 health benefit. In fact, the potential impact of COVID-19 pandemic on routine cancer screening  
338 should be given attention, which may lead to an increased burden of cancer mortality<sup>44</sup>.

339 Regarding the inconclusive effect of genetically predicted COVID-19 severity on EC risk, the  
340 marginal effect size reflects limited clinical significance. Our study, however, has not ruled out  
341 the possibility of subsequent increased risks of other chronic diseases, which, like cancer, is  
342 crucial for reducing disease burden and promoting health equity in post-COVID era<sup>4,5</sup>. To  
343 identify other potential long-term sequelae of COVID-19, cancers in other tissues or of other  
344 sites, cardiovascular, hematological, neurological diseases, as well as possible long-term  
345 chronic inflammation, also require attention.

346 Contrary to the limited genetic evidence observed for vertical pleiotropy, our cross-trait meta-

347 analysis revealed multiple horizontal pleiotropic loci shared between cancers and COVID-19,  
348 suggesting that the previously reported phenotypic links could be largely explained by common  
349 biological mechanisms. The shared signals identified for both the susceptibility and the severity  
350 of COVID-19 further validate the notion that overall genetic correlation may fail to detect  
351 pleiotropic effects at individual variant level. Notably, many of our identified cross-trait effects  
352 were previously implicated in hematologic systems (*ABO*, *THBS3*)<sup>38,45</sup>, immune response  
353 (*WNT3*, *PLEKHMI*, *BCL11A*, *GON4L*)<sup>12</sup>, cell proliferation (*PMF1*, *TTC28*, *KANSL1*), and  
354 hormone secretion (*CRHRI*, *ESRI*, *CYP19A1*)<sup>13,14</sup>, reflecting potential mechanistic pathways  
355 linking COVID-19 to tumorigenesis. Via colocalization analysis, multiple genes (*ABO*, *WNT3*,  
356 *CUX2*, *SURF4*, *LCNIP2*, *CTD-2612A24.1*, *RP11-430N14.4*) showed strong evidence of a  
357 shared causal mechanism (PPH4 > 0.5). Here we highlight two interesting examples, ***ABO*** and  
358 ***WNT3***, both are shared by COVID-19 with more than one investigated cancer.

359 ***ABO***, a protein-coding gene involved in blood group systems biosynthesis and coagulation, is  
360 a well-known COVID-19 risk gene<sup>38,46</sup>. In COVID-19 patients, *ABO* contributes to  
361 hypercoagulation states and thromboses by affecting plasma glycoproteins<sup>46-49</sup>, meanwhile,  
362 such hypercoagulation states also frequently occurs in many cancer patients<sup>50,51</sup>. By regulating  
363 the circulating levels of several pro-inflammatory and immune adhesion molecules, *ABO* might  
364 contribute to both tumorigenesis and COVID-19 development<sup>52,53</sup>. ***WNT3*** represents a typical  
365 immune-related gene, and was identified as a shared gene for COVID-19 severity (rather than  
366 susceptibility) with cancer. By activating the WNT/ $\beta$ -catenin pathway, *WNT3* plays a shaping  
367 role in tumor proliferation, migration and invasion, and functions in a variety of pathological  
368 processes including inflammation, metabolism, neurological development, and fibrosis  
369 processes<sup>54,55</sup>. Demonstrated by previous studies, upregulation of the canonical WNT/ $\beta$ -catenin  
370 pathway in COVID-19 patients is associated with inflammation and cytokine storm<sup>56</sup>, and such  
371 inflammatory immune responses are more likely to occur in patients with severe COVID-19<sup>39,40</sup>.  
372 This may explain why immune-related genes such as *WNT3* were mainly identified to be shared  
373 with COVID-19 severity. Our findings suggest critical roles of coagulation and immune

374 responses in both COVID-19 and female-specific cancers regulations, which help pinpoint  
375 therapeutic targets for both diseases.

376 Integrating GWAS and GTEx tissue-specific expression data, our TWAS analysis further  
377 revealed biological pleiotropy at a gene-tissue pair level. Similar with findings from CPASSOC,  
378 we found shared genes between COVID-19 and cancers that are related to hematologic systems  
379 (*ABO*), immune function (*MUC1*, *PLEKHM1*), and cell proliferation (*KANSL1-AS1*). The  
380 multiple genes identified in blood vessel or heart tissues indicate a biological mechanism  
381 through the cardiovascular system, which corroborates well with the established knowledge as  
382 both COVID-19 and cancer are associated with a number of cardiovascular complications<sup>49,57</sup>.

383 In addition, we identified shared regulatory features in the nervous system, especially for  
384 COVID-19 severity. In fact, the neuro-invasiveness and neuro-invasion of SARS-CoV-2 have  
385 been well-characterized by previous studies, with more than 80% of severe COVID-19 patients  
386 showing neurological manifestations during the acute stage of their disease<sup>58</sup>. Through  
387 peripheral nerves and/or the hematogenous route, viruses can access the cranial nerves and  
388 influence disease manifestation<sup>58</sup>. Moreover, the importance of nervous system in cancer  
389 development has also been increasingly recognized<sup>59</sup>. Cancer cells transduce neurotransmitter-  
390 mediated intracellular signaling pathways which may lead to their activation, growth, and  
391 metastasis<sup>59</sup>. To sum up, these shared biologic pathways for COVID-19 and female-specific  
392 cancers implicate therapeutic strategies in clinical practice of the coexisting groups. More  
393 studies are needed to fully disclose the complex mechanisms.

394 Several limitations need to be acknowledged. **First**, due to unavailability of data, we conduct  
395 our analysis using sex-combined GWAS summary data of COVID-19 which may introduce sex  
396 heterogeneity. Future investigations leveraging large-scale sex-specific data may reduce this  
397 bias. **Second**, to avoid bias from population stratification, we chose GWAS data restricted to  
398 the European ancestry, limiting the generalizability to other ethnic groups. **Third**, the power of  
399 our MR analyses could still be limited by sample size, case proportion, and heritability of IVs,  
400 leading to the overall negative findings. However, by using data from the hitherto largest GWAS



401 for COVID-19, our overall statistical power was considerably raised compared with previous  
402 genetic studies. We had 80% power at an alpha level of 0.05 to detect a 33% increased cancer  
403 risk with infection, a 43% increased risk with hospitalization, and a 47% increased risk with  
404 critical illness<sup>60,61</sup>. Larger GWAS data are needed to validate our results in the future. **Finally**,  
405 the delineation of COVID-19 susceptibility and severity phenotypes across studies may have  
406 been influenced by local social and medical conditions, introducing heterogeneity in the  
407 original meta-GWAS that could not be explained in our analysis.

408

#### 409 **Conclusion**

410 Overall, our genetic analysis extends previous findings by highlighting an intrinsic link  
411 underlying female-specific cancers and COVID-19. COVID-19 is not likely to elevate the  
412 immediate risk of female-specific cancers (BC, EOC, EC), but rather appears to share  
413 mechanistic pathways with these conditions. Such common biological mechanisms are  
414 specifically substantiated by the pleiotropic loci and shared genes identified in our study,  
415 implicating therapeutic strategies for future clinical practice.

416

#### 417 **Competing interests**

418 The authors have declared that no competing interests exist.

419

#### 420 **Acknowledgments**

421 We thank all the patients, staff and investigators who contributed to the COVID-19 Host  
422 Genetics Initiative, BCAC consortium, OCAC consortium and ECAC consortium. This study  
423 was supported by funds from the National Natural Science Foundation of China (81874283,  
424 81673255, 81874282), the National Key R&D Program of China (2020YFC2006505), the  
425 Health Commission of Sichuan Province (20PJ093), the Key R&D Program of Sichuan, China

426 (2022YFS0055), the Recruitment Program for Young Professionals of China, the Promotion  
427 Plan for Basic Medical Sciences, the Development Plan for Cutting-Edge Disciplines, Sichuan  
428 University, and other Projects from West China School of Public Health and West China Fourth  
429 Hospital, Sichuan University.

430

#### 431 **Data availability**

432 This study did not generate new datasets or codes. All data used in our study are publicly-  
433 available. GWAS summary statistics of the COVID-19 Host Genetics Initiative are accessible  
434 at <https://www.covid19hg.org/>. GWAS summary statistics for breast cancer, epithelial ovarian  
435 cancer, and endometrial cancer can be downloaded from the GWAS catalog  
436 (<https://www.ebi.ac.uk/gwas/>) or from the websites of the consortium  
437 (<http://bcac.ccge.medschl.cam.ac.uk/bcacdata/>, <http://ocac.ccge.medschl.cam.ac.uk/>). More  
438 details of the approaches as well as the codes are available at <https://github.com/bulik/ldsc>  
439 (LDSC), <https://mrcieu.github.io/TwoSampleMR/> (TwoSampleMR),  
440 <http://hal.case.edu/~xxz10/zhuweb/> (CPASSOC), [https://github.com/hailianghuang/FM-](https://github.com/hailianghuang/FM-summary)  
441 [summary](https://github.com/hailianghuang/FM-summary) (FM-summary), <https://chr1swallace.github.io/coloc/> (Coloc), [https://www.cog-](https://www.cog-genomics.org/plink/1.9/)  
442 [genomics.org/plink/1.9/](https://www.cog-genomics.org/plink/1.9/) (PLINK), <https://grch37.ensembl.org/info/docs/tools/vep/index.html>  
443 (VEP), <http://gusevlab.org/projects/fusion/> (FUSION).

444 **Reference:**

- 445 1 Gupta, A. *et al.* Extrapulmonary manifestations of COVID-19. *Nature medicine* **26**, 1017-1032,  
446 doi:10.1038/s41591-020-0968-3 (2020).
- 447 2 Hu, B., Guo, H., Zhou, P. & Shi, Z. L. Characteristics of SARS-CoV-2 and COVID-19. *Nature*  
448 *reviews. Microbiology* **19**, 141-154, doi:10.1038/s41579-020-00459-7 (2021).
- 449 3 Brodin, P. Immune determinants of COVID-19 disease presentation and severity. *Nature*  
450 *medicine* **27**, 28-33, doi:10.1038/s41591-020-01202-8 (2021).
- 451 4 Sudre, C. H. *et al.* Attributes and predictors of long COVID. *Nature medicine* **27**, 626-631,  
452 doi:10.1038/s41591-021-01292-y (2021).
- 453 5 Del Rio, C., Collins, L. F. & Malani, P. Long-term Health Consequences of COVID-19. *Jama*  
454 **324**, 1723-1724, doi:10.1001/jama.2020.19719 (2020).
- 455 6 Hawkes, S. *et al.* Recorded but not revealed: exploring the relationship between sex and gender,  
456 country income level, and COVID-19. *The Lancet. Global health* **9**, e751-e752,  
457 doi:10.1016/s2214-109x(21)00170-4 (2021).
- 458 7 Evans, N. G., Berger, Z. D., Phelan, A. L. & Silverman, R. D. Covid-19, equity, and  
459 inclusiveness. *BMJ (Clinical research ed.)* **373**, n1631, doi:10.1136/bmj.n1631 (2021).
- 460 8 Ball, E., Willmott, F., Rivas, C. & Talati, C. COVID-19 in Women's health: Pre-operative  
461 gynaecological assessment and shared decision making. *Best practice & research. Clinical*  
462 *obstetrics & gynaecology* **73**, 12-21, doi:10.1016/j.bpobgyn.2021.03.001 (2021).
- 463 9 Ruge, M., Zorzi, M. & Guzzinati, S. SARS-CoV-2 infection in the Italian Veneto region:  
464 adverse outcomes in patients with cancer. *Nature cancer* **1**, 784-788, doi:10.1038/s43018-020-  
465 0104-9 (2020).
- 466 10 Lara, O. D. *et al.* COVID-19 outcomes of patients with gynecologic cancer in New York City:  
467 An updated analysis from the initial surge of the pandemic. *Gynecologic oncology* **164**, 304-  
468 310, doi:10.1016/j.ygyno.2021.12.004 (2022).
- 469 11 Li, J. *et al.* Epidemiology of COVID-19: A systematic review and meta-analysis of clinical  
470 characteristics, risk factors, and outcomes. *Journal of medical virology* **93**, 1449-1458,  
471 doi:10.1002/jmv.26424 (2021).
- 472 12 Zong, Z., Wei, Y., Ren, J., Zhang, L. & Zhou, F. The intersection of COVID-19 and cancer:  
473 signaling pathways and treatment implications. *Molecular cancer* **20**, 76, doi:10.1186/s12943-  
474 021-01363-1 (2021).
- 475 13 Parmar, H. S. *et al.* Cross Talk between COVID-19 and Breast Cancer. *Current cancer drug*  
476 *targets* **21**, 575-600, doi:10.2174/1568009621666210216102236 (2021).
- 477 14 Chaudhari, S. *et al.* Comorbidities and inflammation associated with ovarian cancer and its  
478 influence on SARS-CoV-2 infection. *Journal of ovarian research* **14**, 39, doi:10.1186/s13048-  
479 021-00787-z (2021).
- 480 15 Cai, C., Ahmed, O. A., Shen, H. & Zeng, S. Which cancer type has the highest risk of COVID-  
481 19 infection? *The Journal of infection* **81**, 647-679, doi:10.1016/j.jinf.2020.05.028 (2020).
- 482 16 Saini, G. & Aneja, R. Cancer as a prospective sequela of long COVID-19. *BioEssays : news*  
483 *and reviews in molecular, cellular and developmental biology* **43**, e2000331,  
484 doi:10.1002/bies.202000331 (2021).
- 485 17 Burgess, S., Scott, R. A., Timpson, N. J., Davey Smith, G. & Thompson, S. G. Using published  
486 data in Mendelian randomization: a blueprint for efficient identification of causal risk factors.  
487 *European journal of epidemiology* **30**, 543-552, doi:10.1007/s10654-015-0011-z (2015).

- 488 18 Zhu, Z., Hasegawa, K., Camargo, C. A., Jr. & Liang, L. Investigating asthma heterogeneity  
489 through shared and distinct genetics: Insights from genome-wide cross-trait analysis. *The*  
490 *Journal of allergy and clinical immunology* **147**, 796-807, doi:10.1016/j.jaci.2020.07.004  
491 (2021).
- 492 19 Bulik-Sullivan, B. *et al.* An atlas of genetic correlations across human diseases and traits. *Nature*  
493 *genetics* **47**, 1236-1241, doi:10.1038/ng.3406 (2015).
- 494 20 Zhu, X. *et al.* Meta-analysis of correlated traits via summary statistics from GWASs with an  
495 application in hypertension. *American journal of human genetics* **96**, 21-36,  
496 doi:10.1016/j.ajhg.2014.11.011 (2015).
- 497 21 Gusev, A. *et al.* Integrative approaches for large-scale transcriptome-wide association studies.  
498 *Nature genetics* **48**, 245-252, doi:10.1038/ng.3506 (2016).
- 499 22 Sung, H. *et al.* Global Cancer Statistics 2020: GLOBOCAN Estimates of Incidence and  
500 Mortality Worldwide for 36 Cancers in 185 Countries. *CA: a cancer journal for clinicians* **71**,  
501 209-249, doi:10.3322/caac.21660 (2021).
- 502 23 Zhang, H. *et al.* Genome-wide association study identifies 32 novel breast cancer susceptibility  
503 loci from overall and subtype-specific analyses. *Nature genetics* **52**, 572-581,  
504 doi:10.1038/s41588-020-0609-2 (2020).
- 505 24 Phelan, C. M. *et al.* Identification of 12 new susceptibility loci for different histotypes of  
506 epithelial ovarian cancer. *Nature genetics* **49**, 680-691, doi:10.1038/ng.3826 (2017).
- 507 25 O'Mara, T. A. *et al.* Identification of nine new susceptibility loci for endometrial cancer. *Nature*  
508 *communications* **9**, 3166, doi:10.1038/s41467-018-05427-7 (2018).
- 509 26 The COVID-19 Host Genetics Initiative, a global initiative to elucidate the role of host genetic  
510 factors in susceptibility and severity of the SARS-CoV-2 virus pandemic. *European journal of*  
511 *human genetics : EJHG* **28**, 715-718, doi:10.1038/s41431-020-0636-6 (2020).
- 512 27 Bland, J. M. & Altman, D. G. Multiple significance tests: the Bonferroni method. *BMJ (Clinical*  
513 *research ed.)* **310**, 170, doi:10.1136/bmj.310.6973.170 (1995).
- 514 28 Burgess, S. & Thompson, S. G. Avoiding bias from weak instruments in Mendelian  
515 randomization studies. *International journal of epidemiology* **40**, 755-764,  
516 doi:10.1093/ije/dyr036 (2011).
- 517 29 Bowden, J., Davey Smith, G. & Burgess, S. Mendelian randomization with invalid instruments:  
518 effect estimation and bias detection through Egger regression. *International journal of*  
519 *epidemiology* **44**, 512-525, doi:10.1093/ije/dyv080 (2015).
- 520 30 Bowden, J., Davey Smith, G., Haycock, P. C. & Burgess, S. Consistent Estimation in Mendelian  
521 Randomization with Some Invalid Instruments Using a Weighted Median Estimator. *Genetic*  
522 *epidemiology* **40**, 304-314, doi:10.1002/gepi.21965 (2016).
- 523 31 Verbanck, M., Chen, C. Y., Neale, B. & Do, R. Detection of widespread horizontal pleiotropy  
524 in causal relationships inferred from Mendelian randomization between complex traits and  
525 diseases. *Nature genetics* **50**, 693-698, doi:10.1038/s41588-018-0099-7 (2018).
- 526 32 Purcell, S. *et al.* PLINK: a tool set for whole-genome association and population-based linkage  
527 analyses. *American journal of human genetics* **81**, 559-575, doi:10.1086/519795 (2007).
- 528 33 Howe, K. L. *et al.* Ensembl 2021. *Nucleic acids research* **49**, D884-d891,  
529 doi:10.1093/nar/gkaa942 (2021).
- 530 34 Schaid, D. J., Chen, W. & Larson, N. B. From genome-wide associations to candidate causal  
531 variants by statistical fine-mapping. *Nature reviews. Genetics* **19**, 491-504, doi:10.1038/s41576-

- 532 018-0016-z (2018).
- 533 35 Farh, K. K. *et al.* Genetic and epigenetic fine mapping of causal autoimmune disease variants.  
534 *Nature* **518**, 337-343, doi:10.1038/nature13835 (2015).
- 535 36 Giambartolomei, C. *et al.* Bayesian test for colocalisation between pairs of genetic association  
536 studies using summary statistics. *PLoS genetics* **10**, e1004383,  
537 doi:10.1371/journal.pgen.1004383 (2014).
- 538 37 Gusev, A. *et al.* Transcriptome-wide association study of schizophrenia and chromatin activity  
539 yields mechanistic disease insights. *Nature genetics* **50**, 538-548, doi:10.1038/s41588-018-  
540 0092-1 (2018).
- 541 38 Mapping the human genetic architecture of COVID-19. *Nature* **600**, 472-477,  
542 doi:10.1038/s41586-021-03767-x (2021).
- 543 39 Yang, X. *et al.* Clinical course and outcomes of critically ill patients with SARS-CoV-2  
544 pneumonia in Wuhan, China: a single-centered, retrospective, observational study. *The Lancet.*  
545 *Respiratory medicine* **8**, 475-481, doi:10.1016/s2213-2600(20)30079-5 (2020).
- 546 40 Huang, C. *et al.* Clinical features of patients infected with 2019 novel coronavirus in Wuhan,  
547 China. *Lancet (London, England)* **395**, 497-506, doi:10.1016/s0140-6736(20)30183-5 (2020).
- 548 41 Gao, R. *et al.* Genetic variation associated with COVID-19 is also associated with endometrial  
549 cancer. *The Journal of infection* **84**, e85-e86, doi:10.1016/j.jinf.2022.01.026 (2022).
- 550 42 Wu, X. *et al.* Novel evidence revealed genetic association between COVID-19 infection,  
551 severity and endometrial cancer. *The Journal of infection* **85**, e1-e3,  
552 doi:10.1016/j.jinf.2022.05.005 (2022).
- 553 43 Li, Z., Wei, Y., Zhu, G., Wang, M. & Zhang, L. Cancers and COVID-19 Risk: A Mendelian  
554 Randomization Study. *Cancers* **14**, doi:10.3390/cancers14092086 (2022).
- 555 44 Janda, M., Paul, C. & Horsham, C. Changes in cancer preventive behaviours, screening and  
556 diagnosis during COVID-19. *Psycho-oncology* **30**, 271-273, doi:10.1002/pon.5575 (2021).
- 557 45 Zhang, C. *et al.* The Integrative Analysis of Thrombospondin Family Genes in Pan-Cancer  
558 Reveals that THBS2 Facilitates Gastrointestinal Cancer Metastasis. *Journal of oncology* **2021**,  
559 4405491, doi:10.1155/2021/4405491 (2021).
- 560 46 Hernández Cordero, A. I. *et al.* Multi-omics highlights ABO plasma protein as a causal risk  
561 factor for COVID-19. *Human genetics* **140**, 969-979, doi:10.1007/s00439-021-02264-5 (2021).
- 562 47 Matsui, T., Titani, K. & Mizuochi, T. Structures of the asparagine-linked oligosaccharide chains  
563 of human von Willebrand factor. Occurrence of blood group A, B, and H(O) structures. *The*  
564 *Journal of biological chemistry* **267**, 8723-8731 (1992).
- 565 48 Teuwen, L. A., Geldhof, V., Pasut, A. & Carmeliet, P. COVID-19: the vasculature unleashed.  
566 *Nature reviews. Immunology* **20**, 389-391, doi:10.1038/s41577-020-0343-0 (2020).
- 567 49 Franchini, M., Favaloro, E. J., Targher, G. & Lippi, G. ABO blood group, hypercoagulability,  
568 and cardiovascular and cancer risk. *Critical reviews in clinical laboratory sciences* **49**, 137-149,  
569 doi:10.3109/10408363.2012.708647 (2012).
- 570 50 Falanga, A., Marchetti, M. & Vignoli, A. Coagulation and cancer: biological and clinical aspects.  
571 *Journal of thrombosis and haemostasis : JTH* **11**, 223-233, doi:10.1111/jth.12075 (2013).
- 572 51 Rodrigues, C. A., Ferrarotto, R., Kalil Filho, R., Novis, Y. A. & Hoff, P. M. Venous  
573 thromboembolism and cancer: a systematic review. *Journal of thrombosis and thrombolysis* **30**,  
574 67-78, doi:10.1007/s11239-010-0441-0 (2010).
- 575 52 Barbalic, M. *et al.* Large-scale genomic studies reveal central role of ABO in sP-selectin and

576 sICAM-1 levels. *Human molecular genetics* **19**, 1863-1872, doi:10.1093/hmg/ddq061 (2010).  
577 53 Paterson, A. D. *et al.* Genome-wide association identifies the ABO blood group as a major locus  
578 associated with serum levels of soluble E-selectin. *Arteriosclerosis, thrombosis, and vascular*  
579 *biology* **29**, 1958-1967, doi:10.1161/atvbaha.109.192971 (2009).  
580 54 Grainger, S. & Willert, K. Mechanisms of Wnt signaling and control. *Wiley interdisciplinary*  
581 *reviews. Systems biology and medicine*, e1422, doi:10.1002/wsbm.1422 (2018).  
582 55 Liu, J. *et al.* Wnt/ $\beta$ -catenin signalling: function, biological mechanisms, and therapeutic  
583 opportunities. *Signal transduction and targeted therapy* **7**, 3, doi:10.1038/s41392-021-00762-6  
584 (2022).  
585 56 Vallée, A., Lecarpentier, Y. & Vallée, J. N. Interplay of Opposing Effects of the WNT/ $\beta$ -Catenin  
586 Pathway and PPAR $\gamma$  and Implications for SARS-CoV2 Treatment. *Frontiers in immunology* **12**,  
587 666693, doi:10.3389/fimmu.2021.666693 (2021).  
588 57 Roh, J. D. *et al.* Plasma Proteomics of COVID-19-Associated Cardiovascular Complications:  
589 Implications for Pathophysiology and Therapeutics. *JACC. Basic to translational science* **7**,  
590 425-441, doi:10.1016/j.jacbts.2022.01.013 (2022).  
591 58 Bauer, L. *et al.* The neuroinvasiveness, neurotropism, and neurovirulence of SARS-CoV-2.  
592 *Trends in neurosciences* **45**, 358-368, doi:10.1016/j.tins.2022.02.006 (2022).  
593 59 Kuol, N., Stojanovska, L., Apostolopoulos, V. & Nurgali, K. Role of the nervous system in  
594 cancer metastasis. *Journal of experimental & clinical cancer research : CR* **37**, 5,  
595 doi:10.1186/s13046-018-0674-x (2018).  
596 60 Shim, H. *et al.* A multivariate genome-wide association analysis of 10 LDL subfractions, and  
597 their response to statin treatment, in 1868 Caucasians. *PloS one* **10**, e0120758,  
598 doi:10.1371/journal.pone.0120758 (2015).  
599 61 Brion, M. J., Shakhbazov, K. & Visscher, P. M. Calculating statistical power in Mendelian  
600 randomization studies. *International journal of epidemiology* **42**, 1497-1501,  
601 doi:10.1093/ije/dyt179 (2013).  
602

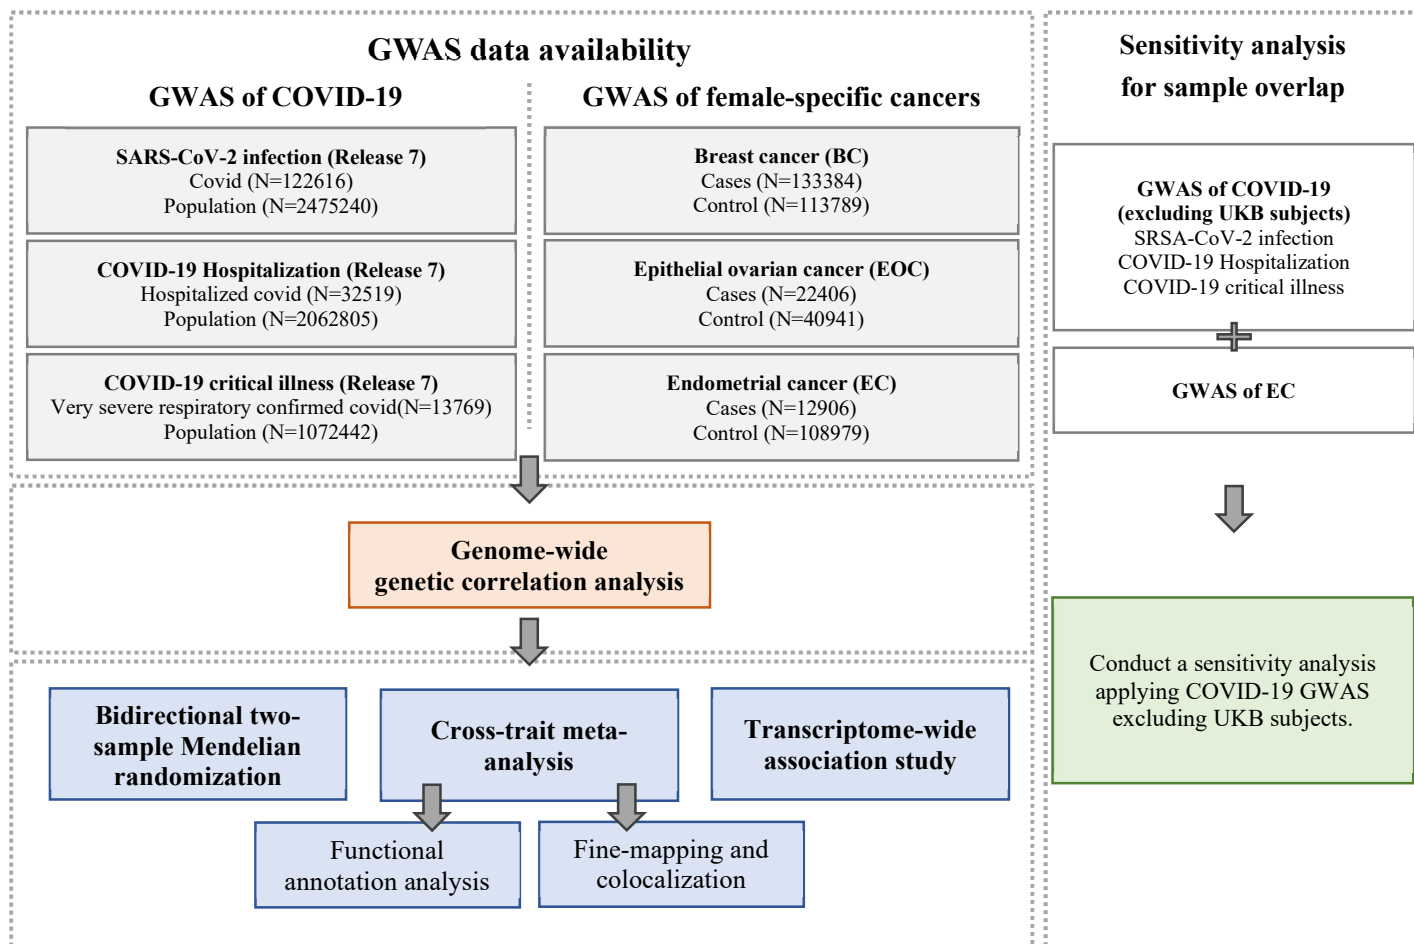

603

604 **Fig 1. Overall study design of genome-wide cross-trait analysis.** GWAS summary statistics  
 605 for each trait of interest were retrieved from publicly available GWAS(s). GWAS: genome-  
 606 wide association study; UKB: UK Biobank.

607

**Table 1. Genetic correlation between female-specific cancers and COVID-19 phenotypes.**

| Cancer | COVID-19 phenotype      | $r_g$       | 95%CI              | P-value                                  |
|--------|-------------------------|-------------|--------------------|------------------------------------------|
| BC     | Infection               | -0.01       | (-0.09,0.08)       | 0.90                                     |
|        | Hospitalization         | 0.06        | (-0.02,0.14)       | 0.16                                     |
|        | Critical illness        | 0.05        | (-0.04,0.13)       | 0.28                                     |
| EOC    | Infection               | 0.01        | (-0.16,0.18)       | 0.91                                     |
|        | Hospitalization         | -0.04       | (-0.19,0.10)       | 0.55                                     |
|        | Critical illness        | -0.02       | (-0.17,0.13)       | 0.77                                     |
| EC     | Infection               | 0.09        | (-0.06,0.24)       | 0.23                                     |
|        | <b>Hospitalization</b>  | <b>0.19</b> | <b>(0.04,0.34)</b> | <b>0.01</b>                              |
|        | <b>Critical illness</b> | <b>0.29</b> | <b>(0.14,0.45)</b> | <b><math>3.00 \times 10^{-4}</math>*</b> |

Bold-face:  $P < 0.05$ ; \* $P < 5.56 \times 10^{-3}$ .

$r_g$ : genetic correlation; CI: confidence interval; Infection: reported SARS-CoV-2 infection vs. population; Hospitalization: COVID-19 hospitalization patients vs. population; Critical illness: very severe respiratory confirmed COVID-19 patients vs. population; BC: breast cancer; EOC: overall invasive epithelial ovarian cancer; EC: endometrial cancer



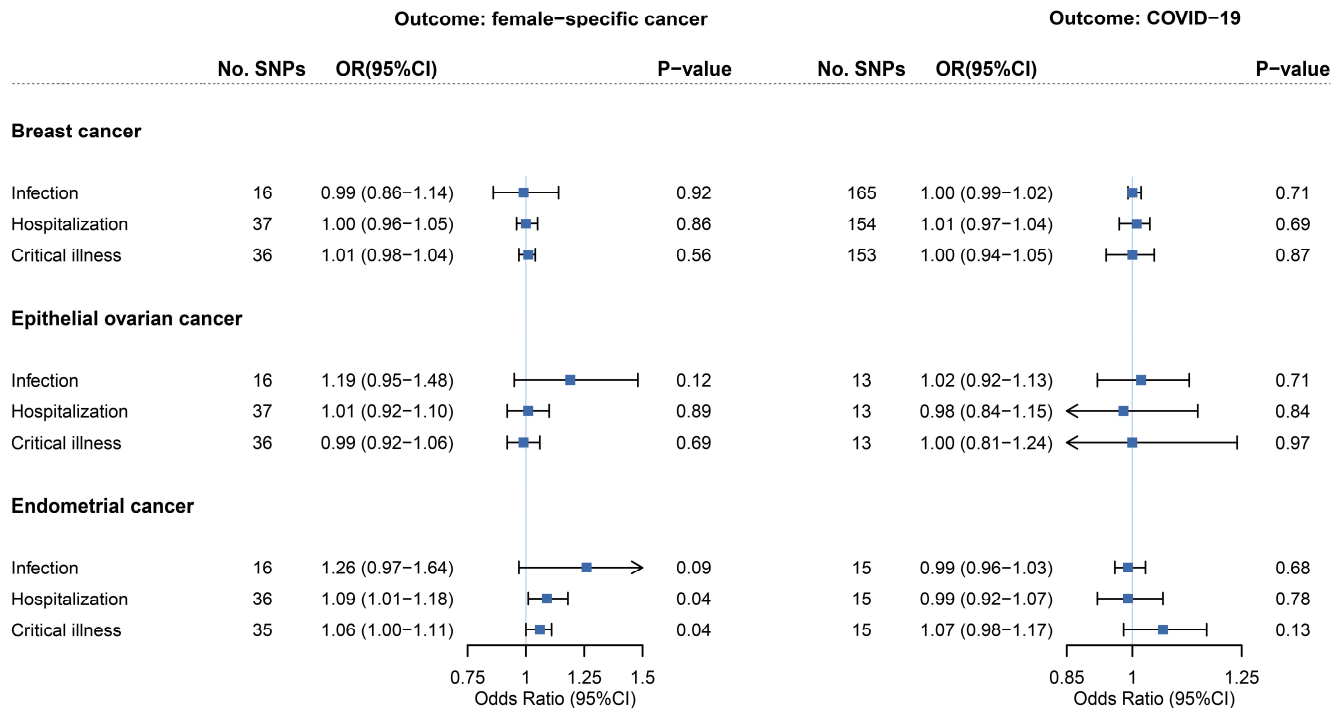

609

610 **Fig 2. Bidirectional Mendelian randomization associations between COVID-19**

611 **phenotypes and female-specific cancers.** On the left are the MR effect estimates of

612 genetically predicted COVID-19 phenotypes on each female-specific cancer by the inverse-

613 variance weighted approach. On the right are the MR effect estimates of genetically predicted

614 female-specific cancer on COVID-19 phenotypes by the inverse-variance weighted approach.

615 Boxes represent the point estimates of MR effects, and error bars represent 95% confidence

616 intervals.

617

618

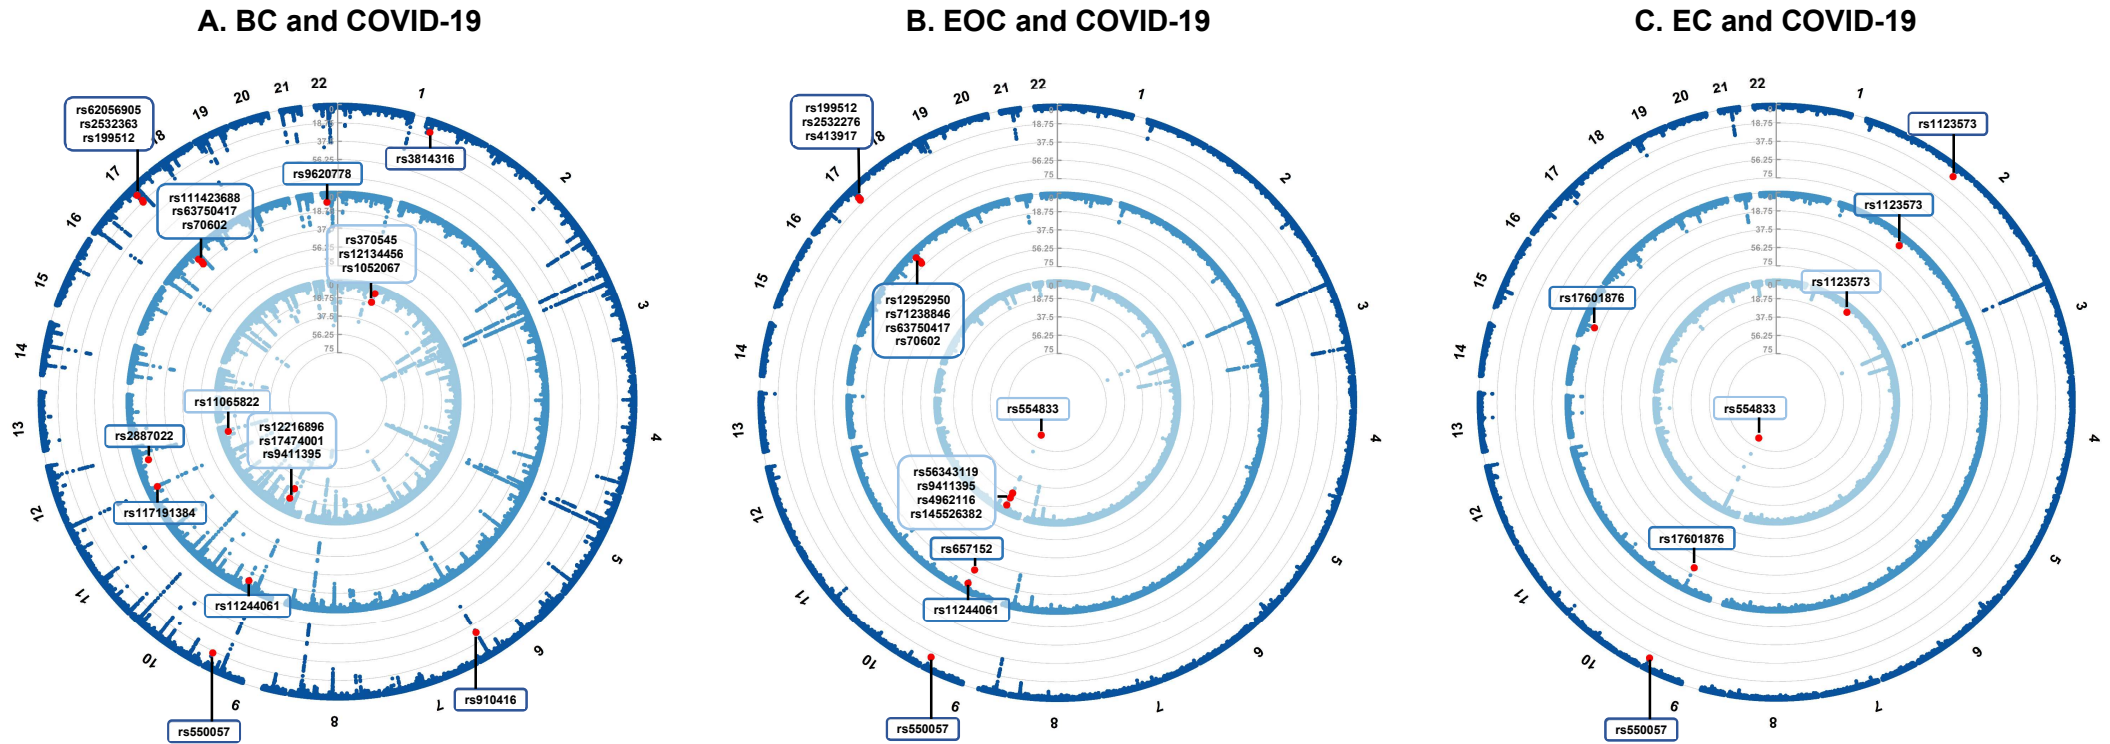

619  
620 **Fig 3. Pleiotropic loci between female-specific cancers and COVID-19 phenotypes identified from cross-trait meta-analysis.** (A) Pleiotropic loci identified for breast  
621 cancer and COVID-19 phenotypes; (B) pleiotropic loci identified for epithelial ovarian cancer and COVID-19 phenotypes; (C) pleiotropic loci identified for endometrial cancer  
622 and COVID-19 phenotypes. In each circular Manhattan plot, the circle from center to periphery shows the cross-trait meta-analysis results between each female-specific cancer  
623 and the three COVID-19 phenotypes (light blue: SRAS-CoV-2 infection, blue: COVID-19 hospitalization, dark blue: COVID-19 critical illness). The outermost numbers  
624 represent chromosomes 1-22. The red dots represent significant pleiotropic SNPs in cross-trait meta-analysis ( $P_{\text{CPASSOC}} < 5 \times 10^{-8}$  and  $P_{\text{single-trait}} < 1 \times 10^{-3}$  in both traits).

**Table 2. TWAS-identified shared gene-tissue pairs between COVID-19 and female-specific cancers after conditional and joint analysis.**

| Gene                              | Tissue Type                           | CHR | No. SNPs | Female-specific cancer |               |       |                         |                  | COVID-19      |        |                         |
|-----------------------------------|---------------------------------------|-----|----------|------------------------|---------------|-------|-------------------------|------------------|---------------|--------|-------------------------|
|                                   |                                       |     |          | Type                   | BEST. GWAS.ID | Z     | $P_{\text{Bonferroni}}$ | Subtype          | BEST. GWAS.ID | Z      | $P_{\text{Bonferroni}}$ |
| <b>Breast cancer and COVID-19</b> |                                       |     |          |                        |               |       |                         |                  |               |        |                         |
| GBAP1                             | Adrenal Gland                         | 1   | 328      | BC                     | rs4971059     | -6.73 | $3.89 \times 10^{-6}$   | Infection        | rs11264339    | 7.05   | $4.06 \times 10^{-7}$   |
| GBAP1                             | Artery Aorta                          | 1   | 328      | BC                     | rs4971059     | -6.49 | $1.96 \times 10^{-5}$   | Infection        | rs11264339    | 7.24   | $1.04 \times 10^{-7}$   |
| GBAP1                             | Artery Coronary                       | 1   | 328      | BC                     | rs4971059     | -5.68 | $3.10 \times 10^{-3}$   | Infection        | rs11264339    | 7.09   | $3.02 \times 10^{-7}$   |
| GBAP1                             | Artery Tibial                         | 1   | 328      | BC                     | rs4971059     | -6.30 | $7.05 \times 10^{-5}$   | Infection        | rs11264339    | 6.97   | $7.24 \times 10^{-7}$   |
| GBAP1                             | Cells Transformed fibroblasts         | 1   | 328      | BC                     | rs4971059     | -6.44 | $2.72 \times 10^{-5}$   | Infection        | rs11264339    | 7.13   | $2.34 \times 10^{-7}$   |
| GBAP1                             | Esophagus Muscularis                  | 1   | 328      | BC                     | rs4971059     | -6.71 | $4.68 \times 10^{-6}$   | Infection        | rs11264339    | 6.80   | $2.39 \times 10^{-6}$   |
| GBAP1                             | Heart Atrial Appendage                | 1   | 328      | BC                     | rs4971059     | -5.68 | $3.10 \times 10^{-3}$   | Infection        | rs11264339    | 7.09   | $3.02 \times 10^{-7}$   |
| GBAP1                             | Skin Not Sun Exposed Suprapubic       | 1   | 328      | BC                     | rs4971059     | -6.84 | $1.79 \times 10^{-6}$   | Infection        | rs11264339    | 7.00   | $5.92 \times 10^{-7}$   |
| GBAP1                             | Skin Sun Exposed Lower leg            | 1   | 328      | BC                     | rs4971059     | -6.62 | $8.19 \times 10^{-6}$   | Infection        | rs11264339    | 7.05   | $4.04 \times 10^{-7}$   |
| ABO                               | Whole Blood                           | 9   | 595      | BC                     | rs495828      | -5.34 | $2.15 \times 10^{-2}$   | Infection        | rs612169      | -10.05 | $2.24 \times 10^{-18}$  |
| KANSL1-AS1                        | Artery Coronary                       | 17  | 29       | BC                     | rs17763086    | -6.03 | $3.93 \times 10^{-4}$   | Hospitalization  | rs8072451     | -7.57  | $8.91 \times 10^{-9}$   |
| KANSL1-AS1                        | Brain Anterior cingulate cortex BA24  | 17  | 29       | BC                     | rs17763086    | -6.03 | $3.93 \times 10^{-4}$   | Hospitalization  | rs8072451     | -7.57  | $8.91 \times 10^{-9}$   |
| RP11-259G18.1                     | Brain Cortex                          | 17  | 66       | BC                     | rs17763086    | -6.03 | $3.93 \times 10^{-4}$   | Hospitalization  | rs8072451     | -7.57  | $8.91 \times 10^{-9}$   |
| CRHR1-IT1                         | Stomach                               | 17  | 93       | BC                     | rs17763086    | -6.03 | $3.93 \times 10^{-4}$   | Hospitalization  | rs8072451     | -7.57  | $8.91 \times 10^{-9}$   |
| RPS26P8                           | Pituitary                             | 17  | 106      | BC                     | rs17763086    | -6.03 | $3.93 \times 10^{-4}$   | Hospitalization  | rs8072451     | -7.57  | $8.91 \times 10^{-9}$   |
| RP11-707O23.5                     | Artery Tibial                         | 17  | 111      | BC                     | rs17763086    | -6.15 | $1.77 \times 10^{-4}$   | Hospitalization  | rs8072451     | -7.87  | $7.98 \times 10^{-10}$  |
| RP11-707O23.5                     | Brain Hypothalamus                    | 17  | 111      | BC                     | rs17763086    | -6.03 | $3.72 \times 10^{-4}$   | Hospitalization  | rs8072451     | -7.58  | $7.84 \times 10^{-9}$   |
| LRRC37A4P                         | Adrenal Gland                         | 17  | 138      | BC                     | rs17763086    | 6.03  | $3.93 \times 10^{-4}$   | Hospitalization  | rs8072451     | 7.57   | $8.91 \times 10^{-9}$   |
| LRRC37A4P                         | Heart Left Ventricle                  | 17  | 138      | BC                     | rs17763086    | 6.07  | $3.05 \times 10^{-4}$   | Hospitalization  | rs8072451     | 7.65   | $4.79 \times 10^{-9}$   |
| ABO                               | Whole Blood                           | 9   | 595      | BC                     | rs495828      | -5.34 | $2.15 \times 10^{-2}$   | Hospitalization  | rs657152      | -5.70  | $2.80 \times 10^{-3}$   |
| RP11-707O23.5                     | Artery Tibial                         | 17  | 111      | BC                     | rs17763086    | -6.15 | $1.77 \times 10^{-4}$   | Critical illness | rs16940665    | -7.59  | $7.13 \times 10^{-9}$   |
| RP11-707O23.5                     | Brain Hypothalamus                    | 17  | 111      | BC                     | rs17763086    | -6.03 | $3.72 \times 10^{-4}$   | Critical illness | rs16940665    | -7.40  | $3.10 \times 10^{-8}$   |
| LRRC37A4P                         | Brain Nucleus accumbens basal ganglia | 17  | 138      | BC                     | rs17763086    | 6.03  | $3.82 \times 10^{-4}$   | Critical illness | rs16940665    | 7.45   | $2.13 \times 10^{-8}$   |
| MSTO2P                            | Muscle Skeletal                       | 1   | 236      | BC                     | rs11264372    | -6.45 | $2.65 \times 10^{-5}$   | Critical illness | rs11803917    | -5.70  | $2.73 \times 10^{-3}$   |
| MSTO2P                            | Pancreas                              | 1   | 236      | BC                     | rs11264372    | -6.28 | $7.94 \times 10^{-5}$   | Critical illness | rs11803917    | -5.43  | $1.32 \times 10^{-2}$   |
| HCN3                              | Brain Nucleus accumbens basal ganglia | 1   | 298      | BC                     | rs4971059     | -7.75 | $2.13 \times 10^{-9}$   | Critical illness | rs35154152    | -5.38  | $1.73 \times 10^{-2}$   |
| GBAP1                             | Brain Cerebellum                      | 1   | 328      | BC                     | rs4971059     | -7.01 | $5.75 \times 10^{-7}$   | Critical illness | rs35154152    | -5.44  | $1.23 \times 10^{-2}$   |

|                                               |                                      |    |     |     |            |       |                       |                  |            |       |                        |
|-----------------------------------------------|--------------------------------------|----|-----|-----|------------|-------|-----------------------|------------------|------------|-------|------------------------|
| MUC1                                          | Pancreas                             | 1  | 339 | BC  | rs4971059  | 6.47  | $2.24 \times 10^{-5}$ | Critical illness | rs35154152 | 5.25  | $3.59 \times 10^{-2}$  |
| ABO                                           | Whole Blood                          | 9  | 595 | BC  | rs495828   | -5.34 | $2.15 \times 10^{-2}$ | Critical illness | rs657152   | -5.57 | $5.98 \times 10^{-3}$  |
| <b>Epithelial ovarian cancer and COVID-19</b> |                                      |    |     |     |            |       |                       |                  |            |       |                        |
| ABO                                           | Artery Aorta                         | 9  | 595 | EOC | rs495828   | 5.60  | $4.92 \times 10^{-3}$ | Infection        | rs612169   | 17.33 | $6.75 \times 10^{-62}$ |
| KANSL1-AS1                                    | Brain Anterior cingulate cortex BA24 | 17 | 29  | EOC | rs4566211  | 7.08  | $3.35 \times 10^{-7}$ | Hospitalization  | rs8072451  | -7.57 | $8.91 \times 10^{-9}$  |
| KANSL1-AS1                                    | Vagina                               | 17 | 29  | EOC | rs4566211  | 7.10  | $2.87 \times 10^{-7}$ | Hospitalization  | rs8072451  | -7.54 | $1.05 \times 10^{-8}$  |
| RP11-259G18.2                                 | Small Intestine Terminal Ileum       | 17 | 59  | EOC | rs4566211  | 7.16  | $1.82 \times 10^{-7}$ | Hospitalization  | rs8072451  | -7.58 | $7.80 \times 10^{-9}$  |
| CRHR1-IT1                                     | Artery Aorta                         | 17 | 93  | EOC | rs17631676 | 7.11  | $2.66 \times 10^{-7}$ | Hospitalization  | rs8072451  | -7.55 | $9.99 \times 10^{-9}$  |
| CRHR1-IT1                                     | Prostate                             | 17 | 93  | EOC | rs17631676 | 7.10  | $2.87 \times 10^{-7}$ | Hospitalization  | rs8072451  | -7.54 | $1.05 \times 10^{-8}$  |
| RPS26P8                                       | Breast Mammary Tissue                | 17 | 106 | EOC | rs17631676 | 7.08  | $3.35 \times 10^{-7}$ | Hospitalization  | rs8072451  | -7.57 | $8.91 \times 10^{-9}$  |
| RPS26P8                                       | Pituitary                            | 17 | 106 | EOC | rs17631676 | 7.08  | $3.35 \times 10^{-7}$ | Hospitalization  | rs8072451  | -7.57 | $8.91 \times 10^{-9}$  |
| LRRC37A4P                                     | Adrenal Gland                        | 17 | 138 | EOC | rs17631676 | -7.08 | $3.35 \times 10^{-7}$ | Hospitalization  | rs8072451  | 7.57  | $8.91 \times 10^{-9}$  |
| PLEKHM1                                       | Brain Cortex                         | 17 | 162 | EOC | rs17631676 | 7.25  | $9.99 \times 10^{-8}$ | Hospitalization  | rs8072451  | -5.19 | $5.00 \times 10^{-2}$  |
| ABO                                           | Artery Aorta                         | 9  | 595 | EOC | rs495828   | 5.60  | $4.92 \times 10^{-3}$ | Hospitalization  | rs657152   | 8.79  | $3.49 \times 10^{-13}$ |
| KANSL1-AS1                                    | Pancreas                             | 17 | 29  | EOC | rs4566211  | 7.12  | $2.61 \times 10^{-7}$ | Critical illness | rs16940665 | -7.42 | $2.83 \times 10^{-8}$  |
| KANSL1-AS1                                    | Vagina                               | 17 | 29  | EOC | rs4566211  | 7.10  | $2.87 \times 10^{-7}$ | Critical illness | rs16940665 | -7.45 | $2.18 \times 10^{-8}$  |
| RP11-259G18.2                                 | Small Intestine Terminal Ileum       | 17 | 59  | EOC | rs4566211  | 7.16  | $1.82 \times 10^{-7}$ | Critical illness | rs16940665 | -7.52 | $1.29 \times 10^{-8}$  |
| RP11-259G18.1                                 | Brain Hippocampus                    | 17 | 65  | EOC | rs4566211  | 7.11  | $2.66 \times 10^{-7}$ | Critical illness | rs16940665 | -7.46 | $1.94 \times 10^{-8}$  |
| CRHR1-IT1                                     | Artery Aorta                         | 17 | 93  | EOC | rs17631676 | 7.11  | $2.66 \times 10^{-7}$ | Critical illness | rs16940665 | -7.46 | $1.94 \times 10^{-8}$  |
| LRRC37A4P                                     | Brain Amygdala                       | 17 | 137 | EOC | rs17631676 | -7.11 | $2.66 \times 10^{-7}$ | Critical illness | rs16940665 | 7.46  | $1.94 \times 10^{-8}$  |
| ABO                                           | Artery Aorta                         | 9  | 595 | EOC | rs495828   | 5.60  | $4.92 \times 10^{-3}$ | Critical illness | rs657152   | 6.68  | $5.70 \times 10^{-6}$  |

Infection: reported SARS-CoV-2 infection vs. population; Hospitalization: hospitalized COVID-19 patients vs. population; Critical illness: very severe respiratory confirmed COVID-19 patients vs. population; BC: breast cancer; EOC: overall invasive epithelial ovarian cancer; TWAS: transcriptome-wide association study; GWAS: genome-wide association study; SNP: single nucleotide polymorphism; CHR: Chromosome; ID: identifier; No. SNPs: number of SNPs in the locus; Z: Z value for TWAS.
